# Supplementary material for: A dye sensitized photosynthesis cell for stable water oxidation mediated by photo-generated bromine
Source: Royal Society of Chemistry journal article supplement (doi:10.1039/d3cc05624d), 2024-01-01
Supplement: d3cc05624d1.pdf [file d3cc05624d1.pdf]

## **Supplementary Information**

### **A Dye Sensitized Photosynthesis Cell for Stable Water Oxidation Mediated by Photo-Generated Bromine**

Ling Fei, Xiao Guo, Dan Liang, Lei Lei and Degao Wang\*

Engineering Laboratory of Advanced Energy Materials, Chinese Academy of Sciences

Ningbo Institute of Materials Technology & Engineering, Ningbo, 315201 P.R. China

Email: wangdegao@nimte.ac.cn

#### **Experimental Section**

##### **Incident photon to current efficiency (IPCE) measurements**

IPCE measurements were performed with the Zennium Pro electrochemical workstation (Zahner Electrochemical Co., Ltd., Kronach, Germany) and CIMPS-QE/IPCE (TLS03 tunable light source) photoelectric conversion efficiency tester.

##### **UV-visible absorbance measurement**

UV-visible absorbance measurements were performed with the CIMPS-fit spectrometer (Electrochemical, Zahner Co., Ltd., Kronach, Germany).

##### **O<sub>2</sub> detection experiments**

Oxygen evolution generated during the photoelectrochemical measurement was monitored using Unisense OX-NP needle microsensor located at the working electrode compartment. Before the experiment, the calibration of the oxygen microsensor was carried

out. Faradaic efficiency was determined according to the total charge passed during the photoelectrochemical measurement and the total amount of generated oxygen.

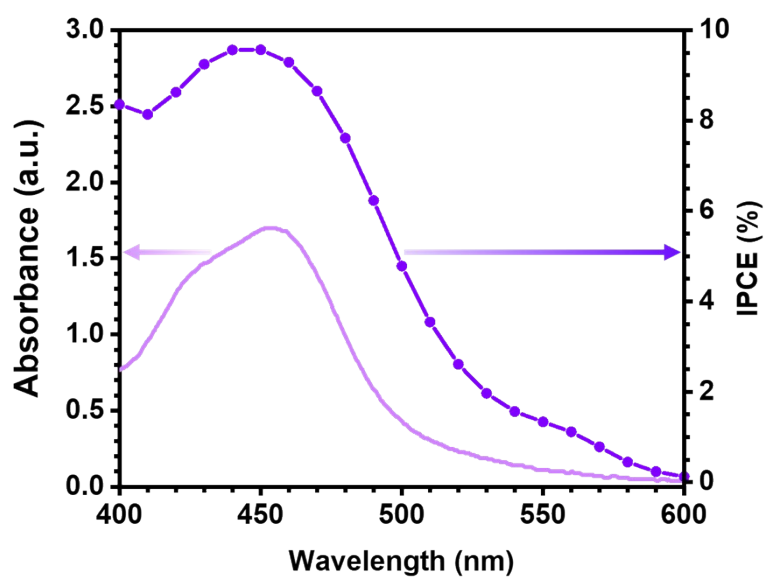

**Figure S1.** UV-visible absorption spectra of chromophore **RuP<sup>2+</sup>** (on the left axis, pale purple) and IPCE measurement for FTO|SnO<sub>2</sub>/TiO<sub>2</sub>-**RuP<sup>2+</sup>** (on the right axis, purple).

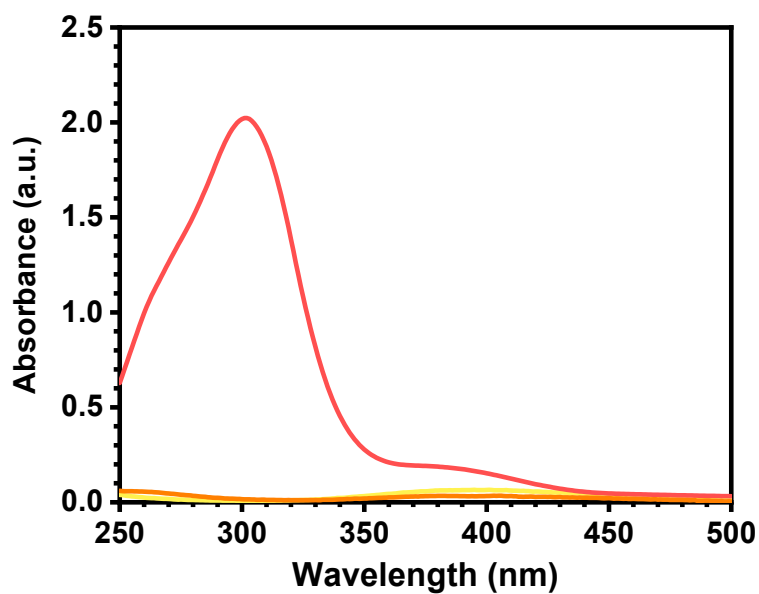

**Figure S2.** UV-visible absorption spectra of 0.5mM Br<sub>2</sub> in 0.1M acetate buffer at pH 4.56 (yellow), 0.5mM Br<sub>2</sub> in 0.1M HClO<sub>4</sub> at pH 1 (orange), and 0.5mM Br<sub>2</sub> in 0.1M HClO<sub>4</sub> at pH 1 with 0.025 M NaBr (red).

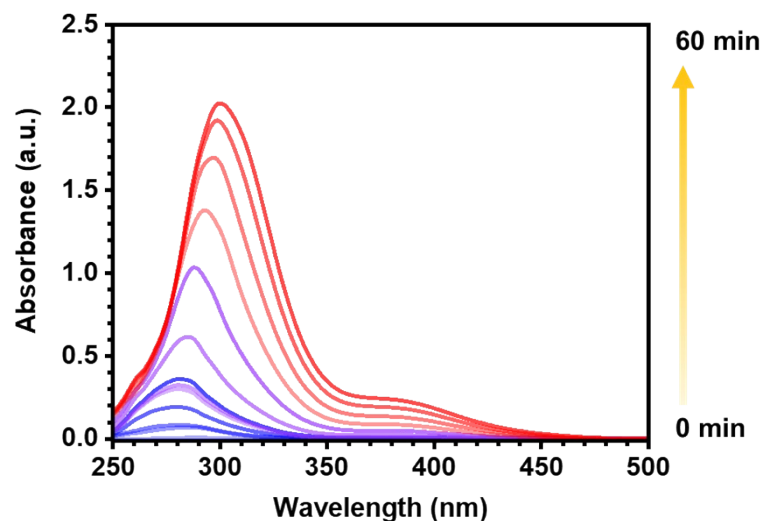

**Figure S3.** UV-visible absorption spectra measured of electrolyte solution during photoelectrolysis of the FTO|SnO<sub>2</sub>/TiO<sub>2</sub>-**RuP**<sup>2+</sup> core/shell sensitization electrode in 0.1M acetate buffer (pH 4.56) with 0.5 M NaBr as the electron-transfer mediator.

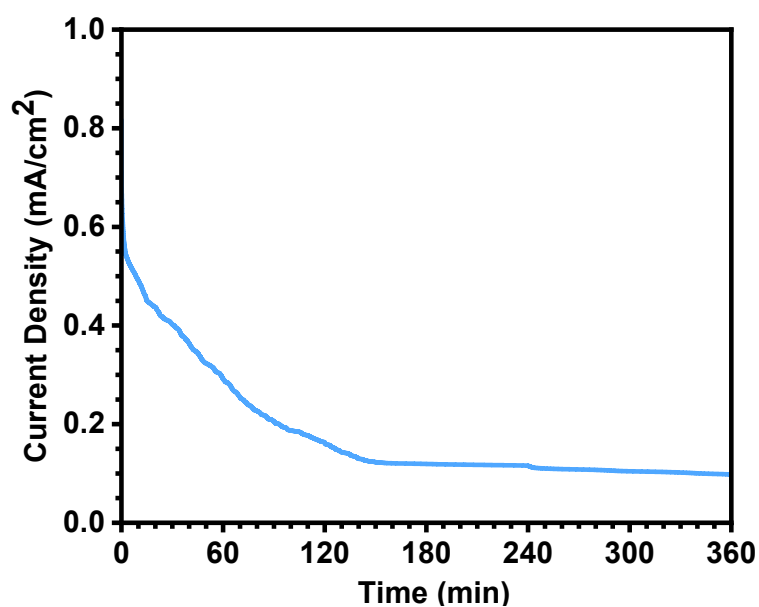

**Figure S4.** Photocurrent obtained for light-driven water oxidation in 0.1 M acetate buffer at pH 4.56, 0.5 M NaBr with a FTO|SnO<sub>2</sub>/TiO<sub>2</sub>-**RuP**<sup>2+</sup> photoanode under 1 Sun illumination (100 mW/cm<sup>2</sup>, > 420 nm filter).
